# Supplementary material for: Ethyl Caffeate Can Inhibit Aryl Hydrocarbon Receptor (AhR) Signaling and AhR-Mediated Potentiation of Mast Cell Activation
Source: MDPI journal article supplement (doi:10.3390/ijms24129997), 2023-06-10
Supplement: s1 [file s1]

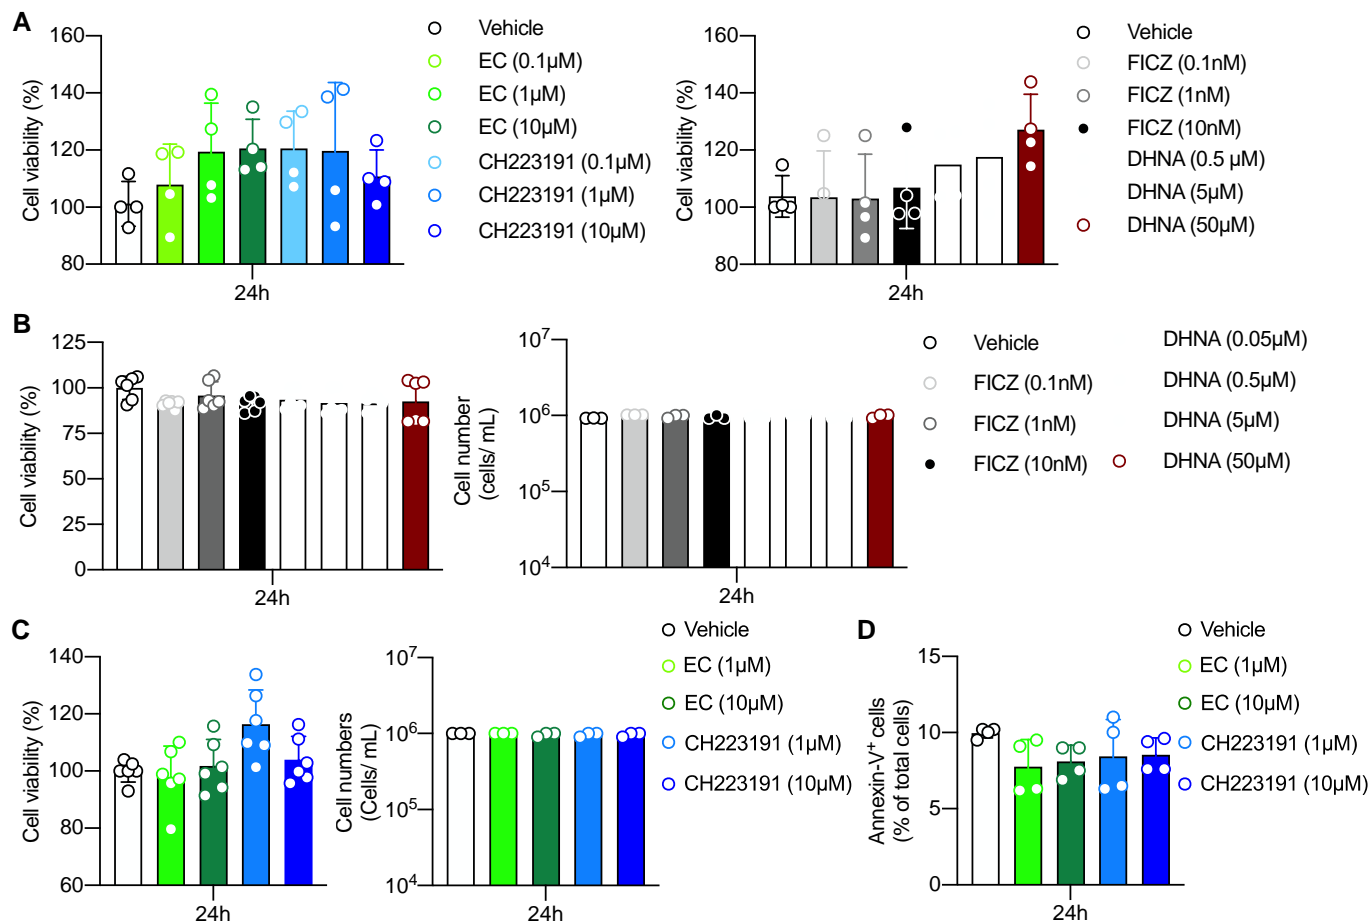

**Supplementary Figure S1. Cell viability of ethyl caffeate treated HEXS34 cells or BMMCs.** (A) After 24h treatment of EC, CH223191, FICZ, and DHNA, HEXS34 cell viability was evaluated by WST8 assay. (n=4). (B) After 24h treatment of FICZ and DHNA, BMMCs viability and cell numbers were evaluated by WST8 assay (n=6) and hemacytometer (n=3), respectively. (C) After 24h treatment of EC, CH223191, BMMCs viability and cell numbers were evaluated by WST8 assay (n=6) and hemacytometer (n=3), respectively. (D) After 24h treatment of EC, CH223191, Annexin-V<sup>+</sup> BMMCs were evaluated by FACS (n=4). Mean ± SD is shown. Statistical differences were determined by One-way ANOVA with Dunnett's post hoc test.

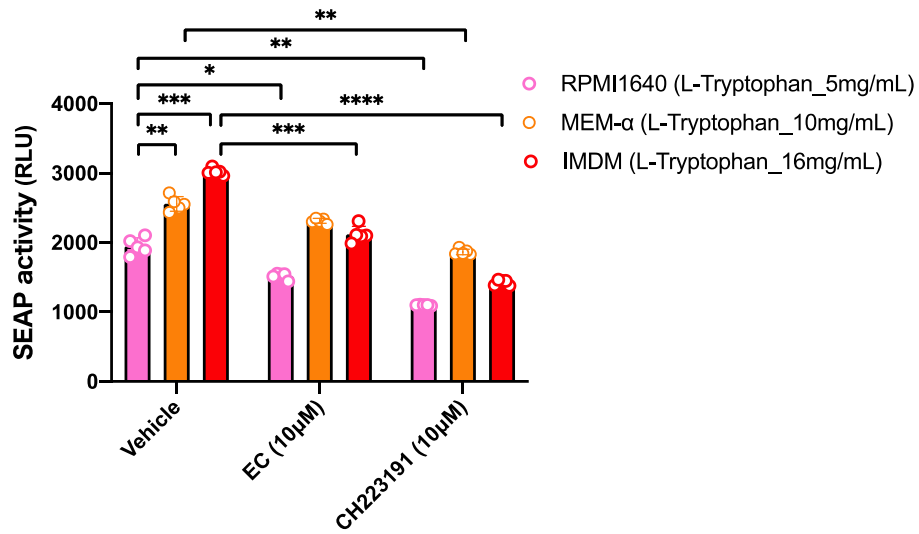

**Supplement Figure S2.** SEAP activity of IMDM-cultured HEXS34 cells was higher than MEM $\alpha$  or RPMI-cultured. After 24h replace culture medium to RPMI1640, MEM- $\alpha$  or IMDM, SEAP activity of HEXS34 cells were evaluated by chemiluminescence (n=5). Mean  $\pm$  SD is shown. Statistical differences were determined by two-way ANOVA with Tukey's post hoc test, \*P<0.05, \*\*P<0.01, \*\*\*P<0.001, \*\*\*\*P<0.0001.

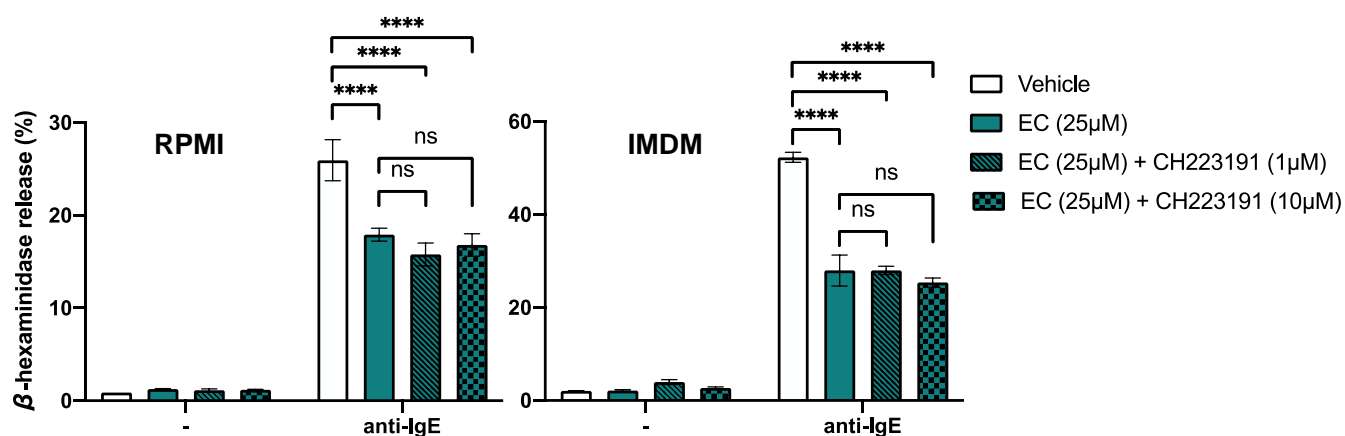

**Suppl ement Figure S3.** Ethyl caffeate and CH223191 share the same target. IgE-mediated release of  $\beta$ -hexosaminidase in EC treated-BMMCs with or without CH223191 for 12h (n=4). Mean  $\pm$  SD is shown. Statistical differences were determined by two-way ANOVA with Tukey's post hoc test, \*\*\*\*P<0.0001, ns: not significant.
